# Supplementary material for: Smartphone problem-solving and behavioural activation therapy to reduce fear of recurrence among patients with breast cancer (SMartphone Intervention to LEssen fear of cancer recurrence: SMILE project): protocol for a randomised controlled trial
Source: PubMed Central journal article supplement — BMJ Open. 2018 Nov 8;8(11):e024794. doi: 10.1136/bmjopen-2018-024794 (PMC6231603; doi:10.1136/bmjopen-2018-024794), 2018-11-08
Supplement: bmjopen-2018-024794supp001.pdf [file bmjopen-2018-024794supp001.pdf]

An appendix table

Details of sessions in smartphone problem-solving and behavioral activation therapies

| Smartphone app                                | Details of each session                                                                                                                                                                                                                                                                                                                                                                                                                                                                                                                                                                   |
|-----------------------------------------------|-------------------------------------------------------------------------------------------------------------------------------------------------------------------------------------------------------------------------------------------------------------------------------------------------------------------------------------------------------------------------------------------------------------------------------------------------------------------------------------------------------------------------------------------------------------------------------------------|
| Problem-solving therapy<br>(9 sessions)       | <ol style="list-style-type: none"><li>1. Outline of problem-solving therapy</li><li>2. Introduction of 5 step of problem-solving</li><li>3. Example of problem-solving</li><li>4. First step (identification, definition, and breakdown of the problem)</li><li>5. Second step (establishing achievable goals)</li><li>6. Third step (generating solutions)</li><li>7. Fourth (evaluating and choosing the solution) and fifth step (implementing the chosen solution and evaluating the outcome after implementation)</li><li>8. Actual training</li><li>9. Concluding session</li></ol> |
| Behavioral activation therapy<br>(2 sessions) | <ol style="list-style-type: none"><li>1. Outline and introduction of behavioral activation therapy including two types of activation (e.g., do pleasurable activity again and challenge new activity) and their actual training</li><li>2. Review of the session, learning knack of behavioral activation and concluding session</li></ol>                                                                                                                                                                                                                                                |
