# Supplementary material for: Smartphone problem-solving and behavioural activation therapy to reduce fear of recurrence among patients with breast cancer (SMartphone Intervention to LEssen fear of cancer recurrence: SMILE project): protocol for a randomised controlled trial
Source: PubMed Central journal article supplement — BMJ Open. 2018 Nov 8;8(11):e024794. doi: 10.1136/bmjopen-2018-024794 (PMC6231603; doi:10.1136/bmjopen-2018-024794), 2018-11-08
Supplement: bmjopen-2018-024794supp002.pdf [file bmjopen-2018-024794supp002.pdf]

# SMILE project

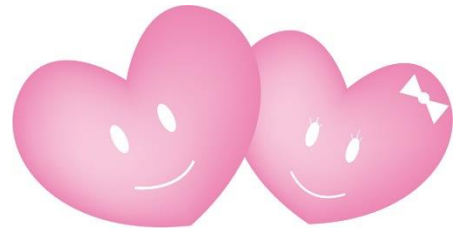

乳がん患者の再発不安・恐怖に対するスマートフォン問題解決療法  
および行動活性化療法の有効性のための無作為割付比較試験

メニュー

ホーム

研究説明ビデオ

研究概要

研究説明文書

Q & A

研究参加

## ホーム

---

### はじめに

このホームページは Smile project 研究の内容を説明しています。研究に参加を希望される方は、研究説明ビデオ、研究概要、研究説明文書をご覧ください。

## 研究説明文書

---

この試験は、公立大学法人 名古屋市立大学大学院 医学研究科長および名古屋市立大学病院長が設置する医学系研究倫理審査委員会（所在地：名古屋市瑞穂区瑞穂町字川澄1）において医学、歯学、薬学その他の医療又は臨床試験に関する専門家や専門以外の方々により倫理性や科学性が十分であるかどうかの審査を受け、実施することが承認されています。またこの委員会では、この試験が適正に実施されているか継続して審査を行います。なお、本委員会にかかわる規程等は、以下、ホームページよりご確認くださいことができます。

名古屋市立大学病院 臨床研究開発支援センター ホームページ “患者の皆様へ” <http://ncu-cr.jp/patient>

## 1 説明書の趣旨

---

### 【研究参加をお願いする理由】

皆様におかれましては、療養しながら様々な負担を抱えた日々を送っていらっしゃるかと推察いたします。私たちのグループは、がんの患者さんによりよいケアを提供するための研究に取り組んでおります。がんの手術後再発なく過ごされていらっしゃる皆様において、再発に対して不安に思われていることを深く理解しております。現在、私たちの研究グループは、スマー

トフォンを用いて日常生活の困り事を解決し、活動の幅を広げることで、再発の不安をどれくらい和らげることができるのかを知るための研究を行っています。この支援方法は有用である可能性がありますが、まだ科学的に証明されていません。

以下に研究の内容について説明してありますので、よくお読みになった上で、ご協力いただける場合には、ウェブで同意をお願いいたします。操作が難しい場合、こちらから文書をダウンロードしていただき、書面として同意書にご署名をお願いいたします。

## 【研究目的】

多くのがんの患者さんが、治療後の再発の不安を抱えていらっしゃる事が明らかになっています。がんの患者さんの不安や恐怖に対し、日常生活の困り事を解決していくこと（これを「問題解決療法」といいます）、楽しくやりがいのある活動を生活に取り入れること（これを「行動活性化療法」といいます）を通して気持ちを和らげることが有効であると言われています。また、近年、スマートフォンが普及し、生活のうえで身近なものになってきていることを踏まえ、私たちのグループはスマートフォンを用いた問題解決療法、行動活性化療法を開発いたしました。この研究は、スマートフォンを

用いてこれら支援を行うことによって、どの程度、精神的な苦痛を和らげることができるかを調べます。

## 【研究への協力について】

### 1) 研究方法について

このスマートフォンを用いたアプリによる治療が、皆様にとって本当に有用であるかどうかを明らかにするために、コンピューターを使ってランダムに五分五分の確率で、2つのグループに分けて研究を行います。この研究を無作為割り付け対照試験といいます。この方法では患者さんの希望でもなく、医師が選択するのでもなく、誰の意志も入れずに決めることができます。この方法は世界中の臨床試験や医学研究で使われており、治療法に対する医師の先入観が入らずに、より客観的に治療法の効果を確認することが出来ます。

今回、研究への参加に同意をいただけたら、皆様は a) 「すぐにスマホアプリを開始するグループ」または b) 「2ヶ月（8週間）後からスマホアプリを開始するグループ」のどちらかに割り付けられます。b) 「2ヶ月後からスマホアプリを開始するグループ」に割り当てられた場合は、研究開始後2ヶ月（8週間）たって皆様のご希望があれば、アプリを使用し参加して頂くことができます。

## 2) 皆様に具体的にお願いしたいこと

### ①アンケート調査

研究に参加していただく皆様に対して、普段の治療やスマートフォンを用いた問題解決療法、行動活性化療法が行われる前後の状態を把握するために、アンケート調査を行います。これによって不安などの気持ちの状態、皆様が必要とする援助（これをニードといいます）、生活の質（クオリティ・オブ・ライフ）などを把握します。

a) 「すぐにスマホアプリを開始するグループ」に割り付けられた方は、調査を5回実施させて頂く予定で、時期は研究に参加されてから同意時（第0週）、第2週、第4週、第8週、第24週になります。

b) 「2ヶ月（8週間）後からスマホアプリ開始するグループ」に割り付けられた方は、調査を4回実施させて頂く予定で、時期は研究に参加されてから同意時（第0週）、第2週、第4週、第8週になります。

この時期になりましたら、iPhoneのウェブ上でアンケートにお答えください。（アンケートの入力が完了していない場合、研究事務局からメールやお電話をさせて頂く予定ですのでご了承ください）。

また、a) 「すぐにスマホアプリを開始するグループ」に割り付けられた方の中でご協力がいただける方に、8週後の時点で、アプリの有用性をどれぐ

らい感じたか、またどのような点がよかったかなど、電話で聞き取りをさせていただきます。予定です。

## ②スマートフォンを用いた問題解決療法、行動活性化療法への参加

1回目、同意時（第0週）のアンケート記入後、a) 「すぐにスマホアプリを開始するグループ」に割り付けられた方は、スマートフォンを用いた問題解決療法、行動活性化療法をすぐに実施していただきます。スマートフォンを用いた問題解決療法、行動活性化療法は「解決アプリ」「元気アプリ」を使い、ご自分で進めていただきます（アプリは週におおよそ各30分程度かかります。アプリはたくさん実施していただいたほうがより効果的ですので、みなさんの自習を励ますために、事務局からメールを第8週までは毎週お送りいたします。）。b) 「2ヶ月（8週間）後からスマホアプリを開始するグループ」に割り付けられた方は、ご希望に応じて、2ヶ月（8週間）後からアプリを使っていただきます。

## ③アプリ内容についての調査

【a) 「すぐにスマホアプリを開始するグループ」に割り付けられた方のみ】

研究が終了した時点（第8週）で、協力して頂ける方に、アプリを使ってみてよかった点や問題解決療法、行動活性化療法で役に立った部分とその理

由について調査をさせていただきます。調査は電話で行わせて頂きます（10分程度を予定しております）。

### 【研究の流れと研究参加基準】

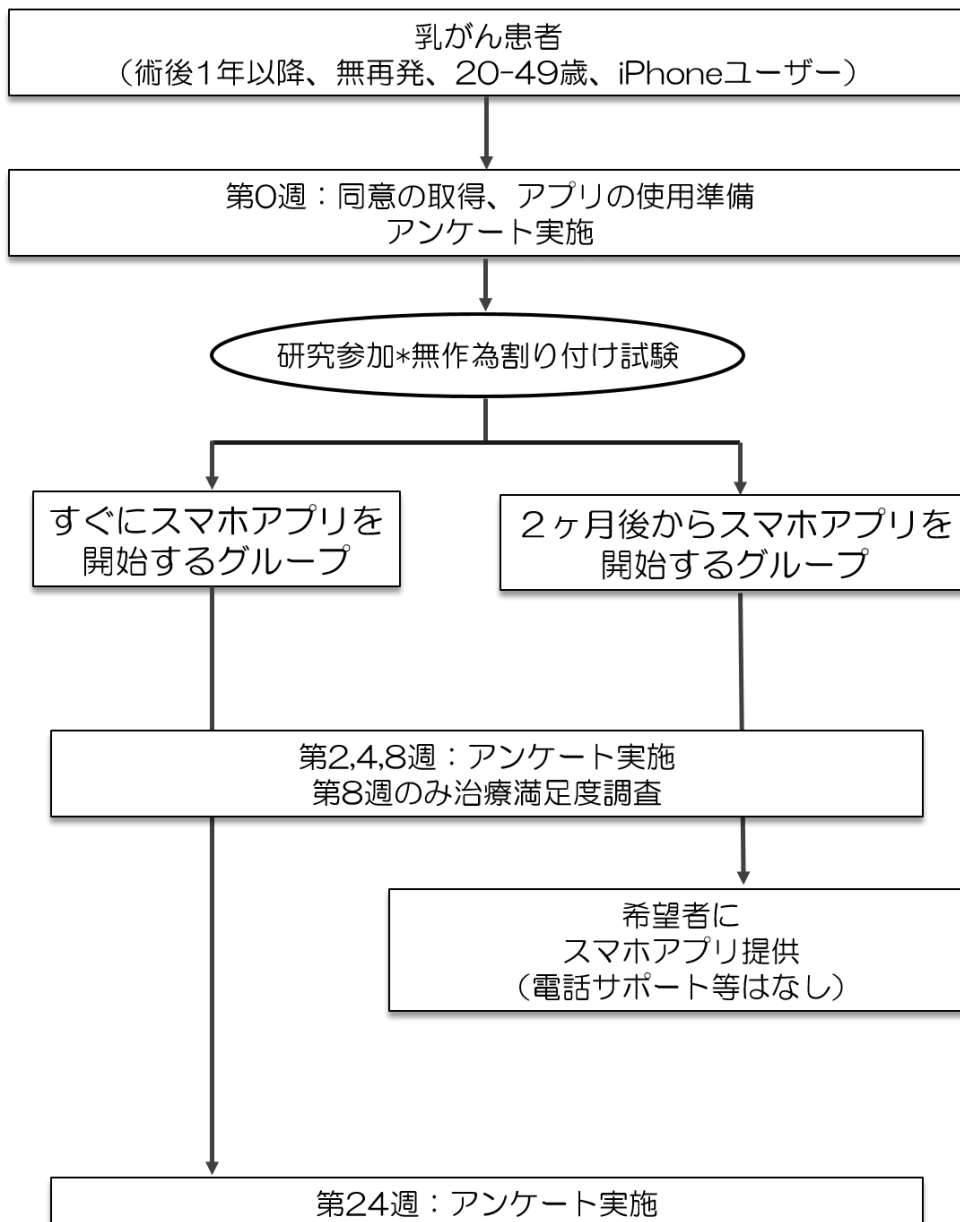

以下のすべてに当てはまる方は、研究に参加いただけます。

- 1) 同意するときに 20 歳以上 49 歳以下の女性
- 2) 乳がん患者
- 3) 再発や転移がない
- 4) 同意するときに手術から 1 年以上経過していること
- 5) アンケートに記入・協力できる
- 6) iPhone または iPad を使用していること (iPad についてはネット環境下での使用をお願いできる方)

また、以下の条件に 1 つでも当てはまる方は、この研究に参加いただけません。

- 1) 重い身体疾患 (症状のために家事や軽作業ができない) や乳がん以外のがんをもっている、または、かかったことがある (完治を含む)
- 2) 日本語の読み書きが難しい
- 3) 現在、心療内科、精神科に受診している
- 4) 問題解決療法、行動活性化療法、認知行動療法を経験したことがある
- 5) 研究者が研究への参加を不適當であると判断させていただいた場合



|             | 項目           | 第0週 | 第2週 | 第4週 | 第8週          | 第24週 |
|-------------|--------------|-----|-----|-----|--------------|------|
| 研究者         | 説明と同意        | ○   |     |     |              |      |
| データセンタ<br>ー | 割り付け         | ○   |     |     |              |      |
| 参加者         | アンケート        | ○   | ○   | ○   | ○            | ○(*) |
|             | 治療満足度        |     |     |     | ○(*)         |      |
|             | アプリの内<br>容調査 |     |     |     | ○(*)<br>(**) |      |

(\*) すぐにスマホアプリを開始するグループのみ

(\*\*) 対象はご協力いただける一部の方のみ

### 【研究参加は自由意思に任されること】

本研究へのご協力は皆様個人の自由意思によるものです。いったん同意された後でも、理由を明確にすることなくいつでも同意を撤回することができます。不参加や途中撤回の場合でも、何ら不利益は生じません。

## 2 研究に参加した場合に予想される利益および不利益

---

本研究では、再発の不安や恐怖に対してスマートフォンを用いた問題解決療法、行動活性化療法を行います。研究に参加して頂くことによって、精神的な負担が軽減し、生活の質が改善する可能性があります。

また、本研究は、アンケートへの記入、メール、スマートフォンのアプリ操作が主で、皆様の身体に与える悪影響はございません。しかしながら、肉体的なことに触れることで皆様に不快感を与えることがあるかもしれません。一方、これまでの私どもの同様の研究の経験からは、不利益はほとんどないと考えております。

## 3 健康被害等への補償

---

本研究は、ほぼ危険性は伴わないため、研究を行うことによる健康被害に対して補償や賠償保険などは準備しておりません。もし、身体状態や精神状態が悪化した場合には、お手数ですがかかりつけの医療機関でご相談いただければ幸いです。

## 4 研究の資金源等

---

本研究は以下の研究費の支援のもと行われています。

- 日本医療研究開発機構研究費「乳がん患者の再発不安・恐怖に対するスマートフォン行動活性化および問題解決療法の有効性-無作為割付比較試験（主任研究者 明智龍男）」
- 名古屋市立大学特別研究奨励費「乳がんサバイバーの再発不安・恐怖に対する Information and communication technology (ICT) を応用した問題解決療法の有用性に関する予備的検討（研究代表者 明智龍男）」
- 文部科学省科学研究費補助金基盤研究 B 「致命的疾患の再発・転移の不安、恐怖の評価法の確立および新規心理学的介入方法の開発（主任研究者 明智龍男）」
- 国立がん研究センター研究開発費「支持療法の開発および検証のための基盤整備（主任研究者 内富庸介）」
- 文部科学省科学研究費補助金若手研究 B 「がん罹患に伴う心理的成長を促すスマートフォンによる問題解決療法の開発と効果検証（主任研究者 今井文信）」

## 5 個人情報情報の保護

---

研究において得られたプライバシーに関する情報は厳重に守られます。皆様の名前などの個人を識別する情報は、この研究の結果の報告や発表に使用されることはありません。

## 6 研究計画等の開示

---

皆様が希望すれば、他の参加者の個人情報や本研究の独創性の確保に支障がない範囲内で、研究計画および研究の方法に関する資料を閲覧することができます。閲覧希望の場合は事務局までお問合せください。

## 7 研究結果及び記録の公表

---

個人情報が分からないようにした上で、本研究の結果を統計学的に分析し、結果及び臨床試験を通じて得られた皆様に係わる記録が、医学および看護学の発展のため学会や学術雑誌等で公表される予定であることをご了承下さい。なお、アプリによる治療経過における治療内容、アンケートの結果などすべてが分析の対象となります。研究の進み具合やその成果については、ご希望がありましたら説明いたします。

## 8 研究から生ずる知的所有権について

---

本研究によって特許が生じた場合は、名古屋市立大学に帰属するものいたします。

## 9 研究期間中のデータ等について

---

この研究で得られたアンケート（データ）の結果は、主にスマートフォンを用いた問題解決療法、行動活性化療法の介入前後の状態を比較するために

用います。これらデータ（要配慮個人情報）は、別に作成した対応表で名前や年齢などの個人情報と照合できるような形にいたします。なお前述の対応表は、名古屋市立大学大学院医学研究科精神・認知・行動医学分野内の金庫にて厳重に保管いたします。

## 10 研究終了後のデータ等について

---

この研究で得られたデータは、原則として研究終了後5年で、名古屋市立大学病院の機密書類として廃棄します。

将来、本データを別の医学・看護学の研究に用いる場合には、改めてその研究について倫理審査委員会に申請し、承認を得た上で実施いたします。

## 11 費用負担について

---

スマホアプリはすべて無料でご利用いただけます。ただし、ご利用の携帯電話会社にはアプリの使用時やデータの送受信にかかる通信料はお支払いいただく必要があります。アプリを使って頂くためにパケット定額サービスの加入をお勧めします。また、本研究へのご参加に関して、些少なからず謝礼（アマゾンギフト券を予定）をお送りさせていただきます。

## 研究組織

---

### 研究責任者

明智龍男 名古屋市立大学大学院医学研究科・精神・認知・行動医学 教授

### 研究分担者

岩田 広治 愛知県がんセンター中央病院乳腺科 部長兼副院長

桜井 なおみ キャンサー・ソリューションズ株式会社 代表取締役社長

古川 壽亮 京都大学大学院医学研究科健康増進・行動学分野 教授

堀越 勝 国立精神・神経医療研究センター認知行動療法センター センター長

内富 庸介 国立がん研究センター支持療法開発センター センター長

今井 文信 名古屋市立大学病院緩和ケア部 臨床研究医

内田 恵 名古屋市立大学病院緩和ケア部 助教

香月 富士日 名古屋市立大学看護学部 教授

樫野 香苗 名古屋市立大学看護学部 准教授

山口 拓洋 東北大学大学院医学系研究科 教授

宮地 天平 国立がん研究センター社会と健康研究センター健康支援研究部

益子 友恵 国立がん研究センター社会と健康研究センター健康支援研究  
部

## 研究参加

---

本研究への参加を希望される方は、必要事項をご記入いただき、参加に関する条件に該当しているかを確認の上「参加する」ボタンを1回押してください。

|                                                                                                                             |                               |
|-----------------------------------------------------------------------------------------------------------------------------|-------------------------------|
| 氏名                                                                                                                          | 姓 名                           |
| ふりがな                                                                                                                        | 姓 名                           |
| 年齢                                                                                                                          | ※20-49歳がプルダウン等で選択できるようにしてはどうか |
| 携帯番号                                                                                                                        |                               |
| メールアドレス<br>携帯電話のメールアドレスを入力される方は、予めドメイン「mail.sports-web.jp (仮)」からのメールを受信できる設定にしてください。<br>Gmail アドレスをご使用の方は必ず「迷惑メール」をご確認ください。 |                               |
| メールアドレス<br>(確認用)                                                                                                            |                               |
| 乳がん治療のため通院<br>されている病院名                                                                                                      |                               |



- ホームページ上の研究説明ビデオおよび研究概要を確認した
- 申込時の年齢が 20 歳以上から 49 歳以下である
- 乳がんと診断されており、現在までに再発・転移はない
- 乳がんの手術後 1 年以上経過している
- iPhone または iPad を日常的に使用している

研究に参加する

(研究参加ボタンを押した後)

研究に申込みいただき、ありがとうございました。

参加受付のメールが登録いただいたメールアドレスに届きますので、ご確認をお願いいたします。後日、事務局から問い合わせの電話をさせていただきます。
